# Supplementary material for: Dynamic repulsive interaction enables an asymmetric electron–phonon coupling for improving Raman scattering
Source: Royal Society of Chemistry journal article supplement (doi:10.1039/d3cp05835b), 2024-01-01
Supplement: d3cp05835b1.pdf [file d3cp05835b1.pdf]

## Supporting Information

### **Dynamic repulsive interaction enables an asymmetric electron-phonon coupling for improving Raman scattering**

Jiawei Shen<sup>a</sup>, Jiaxin Zhang<sup>a</sup>, Zirui Fu<sup>a</sup>, Yan Pan<sup>a</sup>, Xiaowan Li<sup>a</sup>, Shuyi Wu<sup>\*,a</sup>, Yun Shan<sup>\*,b</sup> and Lizhe Liu<sup>\*,c</sup>

*<sup>a</sup>Jiangsu Key Laboratory of Micro and Nano Heat Fluid Flow Technology and Energy Application, School of Physical Science and Technology, Suzhou University of Science and Technology, Suzhou, 215009, China*

*<sup>b</sup>Key Laboratory of Advanced Functional Materials of Nanjing, Nanjing Xiaozhuang University, Nanjing 211171, People's Republic of China*

*<sup>c</sup>National Laboratory of Solid State Microstructures and School of Physics, Nanjing University, Nanjing 210093, PR China*

\*Corresponding author: [wsy@usts.edu.cn](mailto:wsy@usts.edu.cn) (S.Y.Wu)

\*Corresponding author: [yshan@njxzc.edu.cn](mailto:yshan@njxzc.edu.cn) (Y.Shan)

\*Corresponding author: [lzliu@nju.edu.cn](mailto:lzliu@nju.edu.cn) (L.Z.Liu)

## Enhancement factor (EF) calculation method

The (enhancement factor) EF is calculated according to the following formula:

$$EF = \frac{I_{SERS} / N_{SERS}}{I_{norm} / N_{norm}} \quad \backslash *$$

MERGEFORMAT (1)

where

$$N_{SERS} = \frac{CVN_A A_{Raman}}{A_{sub}} \quad \backslash *$$

MERGEFORMAT (2)

$$N_{norm} = \frac{\rho h N_A A_{Raman}}{M} \quad \backslash *$$

MERGEFORMAT (3)

Thus

$$\frac{N_{norm}}{N_{SERS}} = \frac{\rho h A_{sub}}{CVM} \quad \backslash *$$

MERGEFORMAT (4)

$$EF = \frac{I_{SERS}}{I_{norm}} \times \frac{\rho h A_{sub}}{CVM} \quad \backslash *$$

MERGEFORMAT (5)

Table 1 Parameters and values in equations above.

| Symbol     | Meaning                                                             | Value                                                                                                                |
|------------|---------------------------------------------------------------------|----------------------------------------------------------------------------------------------------------------------|
| $EF$       | Enhancement factor                                                  | $2.15 \times 10^8$ (611 $\text{cm}^{-1}$ )<br>$5.59 \times 10^7$ (772 $\text{cm}^{-1}$ )                             |
| $I_{SERS}$ | Intensity of selected peak in SERS spectra                          | 29.10 (611 $\text{cm}^{-1}$ , $1 \times 10^{-12}$ mol/L)<br>14.08 (772 $\text{cm}^{-1}$ , $1 \times 10^{-11}$ mol/L) |
| $N_{SERS}$ | Probe molecules number illuminated by laser in SERS spectra         | (calculated)                                                                                                         |
| $I_{norm}$ | Intensity of selected peak in normal Raman spectra                  | 6767.46 (611 $\text{cm}^{-1}$ , original value)<br>3426.66 (772 $\text{cm}^{-1}$ , original value)                   |
| $N_{norm}$ | Probe molecules number illuminated by laser in normal Raman spectra | (calculated)                                                                                                         |

|             |                                           |                              |
|-------------|-------------------------------------------|------------------------------|
| $C$         | Molar concentration of probe molecule     | $1 \times 10^{-12}$ mol/L    |
| $V$         | Volume of probe molecule solution droplet | 10 $\mu$ L                   |
| $N_A$       | Avogadro constant                         | $6.02 \times 10^{23}$        |
| $A_{Raman}$ | Laser spot area                           | 1 $\mu$ m (diameter)         |
| $A_{sub}$   | Area covered by probe molecule solution   | $\sim \pi/4$ cm <sup>2</sup> |
| $\rho$      | Mass density of probe molecule            | 0.79 g/cm <sup>3</sup>       |
| $h$         | Penetration depth of laser                | $\sim 21$ $\mu$ m            |
| $M$         | Molar molecular weight of probe molecule  | 479 g/mol                    |

For the acquisition of  $I_{norm}$ , R6G powder was dissolved into 1 mol/L and dripped to silicon wafer to conduct normal Raman test when completed dried. All spectra and intensity values acquired in the same circumstance were averaged (take the median) by at least 10 instances to minimize inevitable testing fluctuation. **Fig. S1** presents the contrast of different results of R6G powder and completely dried solution with significant intensity deviation. Comparing to the powder, dried solution possesses tightly converged molecules that contributed to the signal. Additionally, powder will scatter most of the incident photons as well as Raman photons.

Besides, the probe molecules adsorbed on substrate and silicon wafer were considered to be uniform with surface number density  $\rho_s$  based on following formula:

$$\rho_s = \frac{CVN_A}{A_{sub}} \quad |*$$

MERGEFORMAT (6)

The  $\rho_s$  under  $1 \times 10^{-12}$  mol/L would be  $7.67 \times 10^{10}$  molecules/m<sup>2</sup>.

### Polarized Raman test method

Polarized Raman testing was facilitated by instruments integrated with ‘half-wave plate’ (retarder). The polarization angle of laser could be adjusted by rotating half-wave plate. Samples were placed on platform and not rotated manually. Raman signals were acquired under certain rotation angle with increment of 15 degree, according to **Fig. 4(d)**. Notably, the polarization angle of transmitted laser will rotate  $2\theta$  degree if half-wave plate was rotated  $\theta$  degree, leading to the 4-lobed shape of polarized diagram in **Fig. 4(d)**.

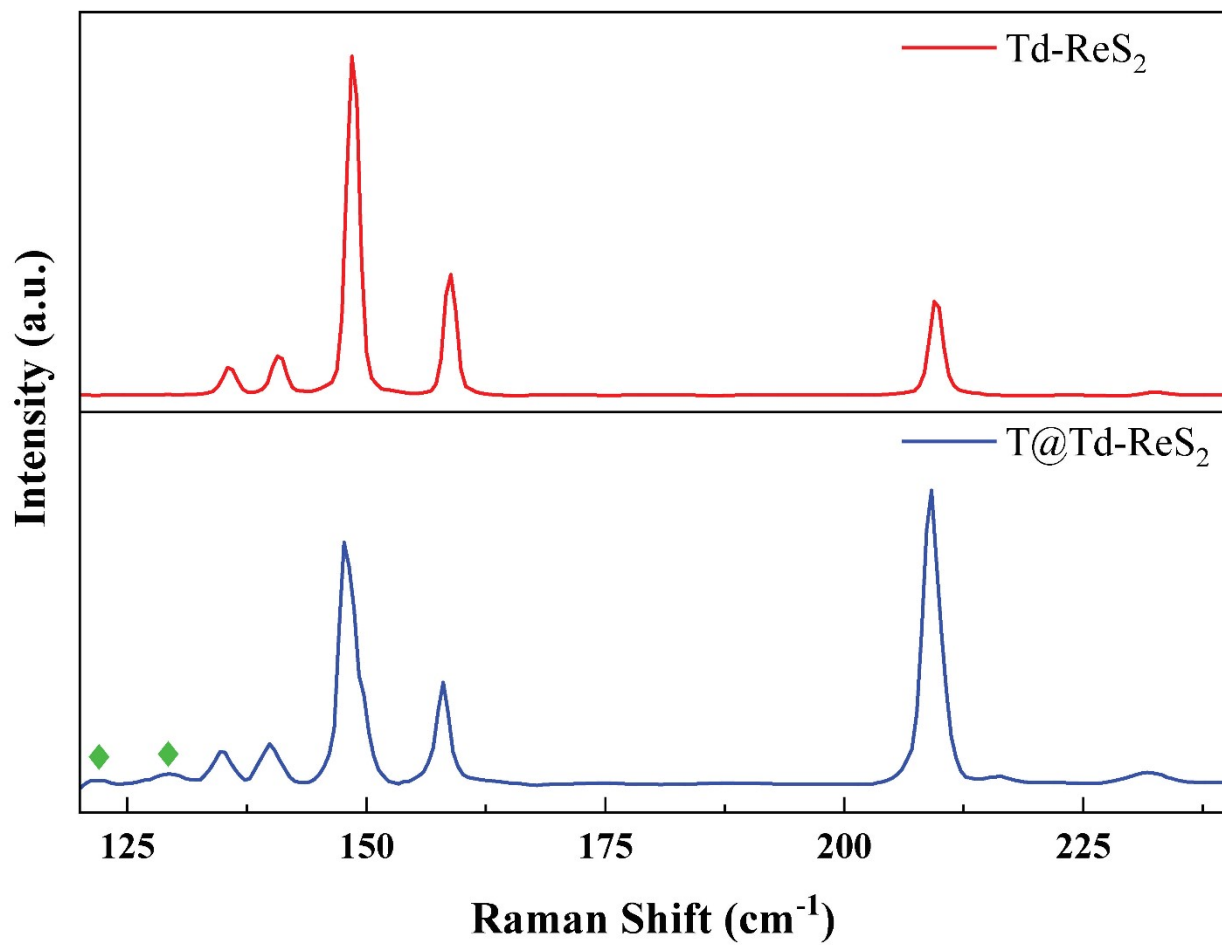

**Fig. S1** Raman signal of Td-ReS<sub>2</sub> and T@ Td-ReS<sub>2</sub>, where green rhombus represents the newly introduced Raman peak on 122 cm<sup>-1</sup> and 129 cm<sup>-1</sup>.

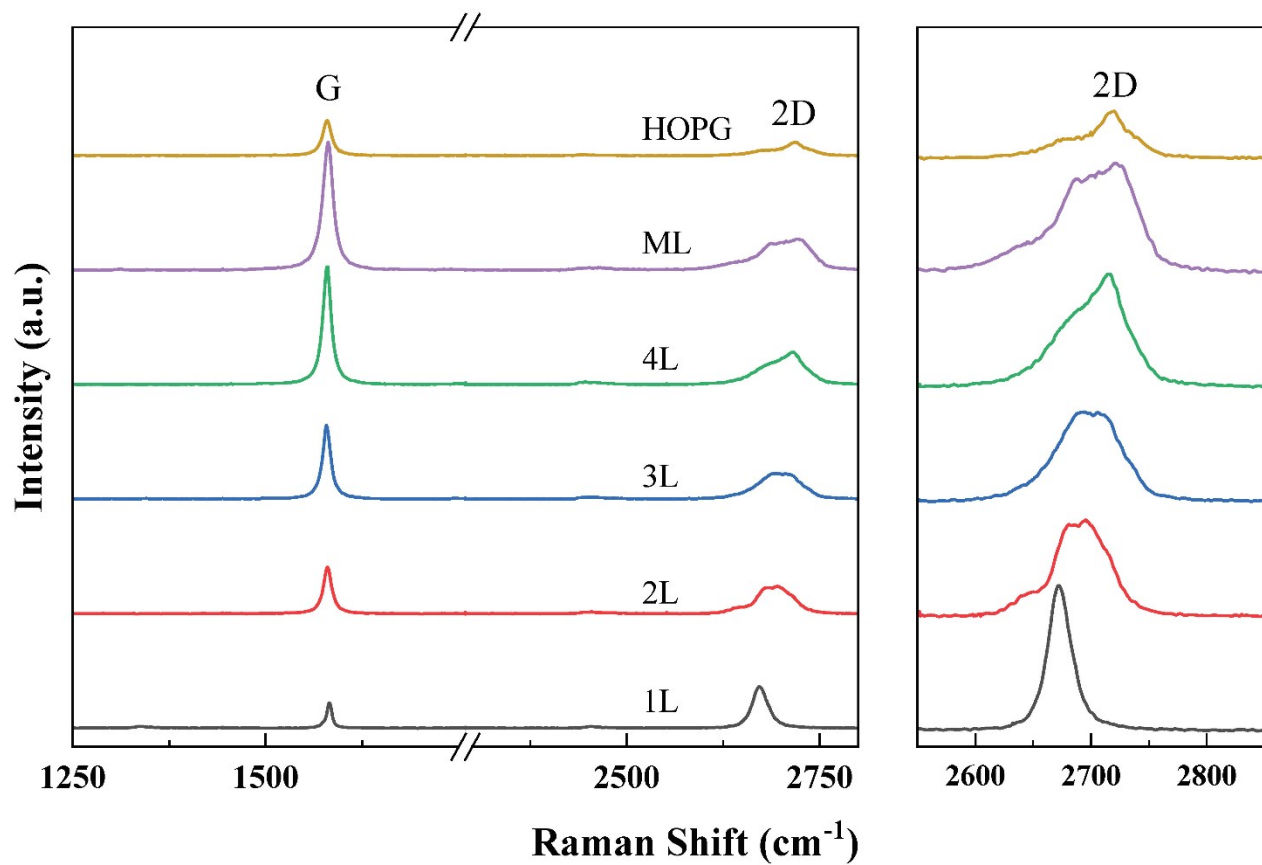

Fig. S2 Raman signal of 1-4 layer, multilayer graphene and HOPG.

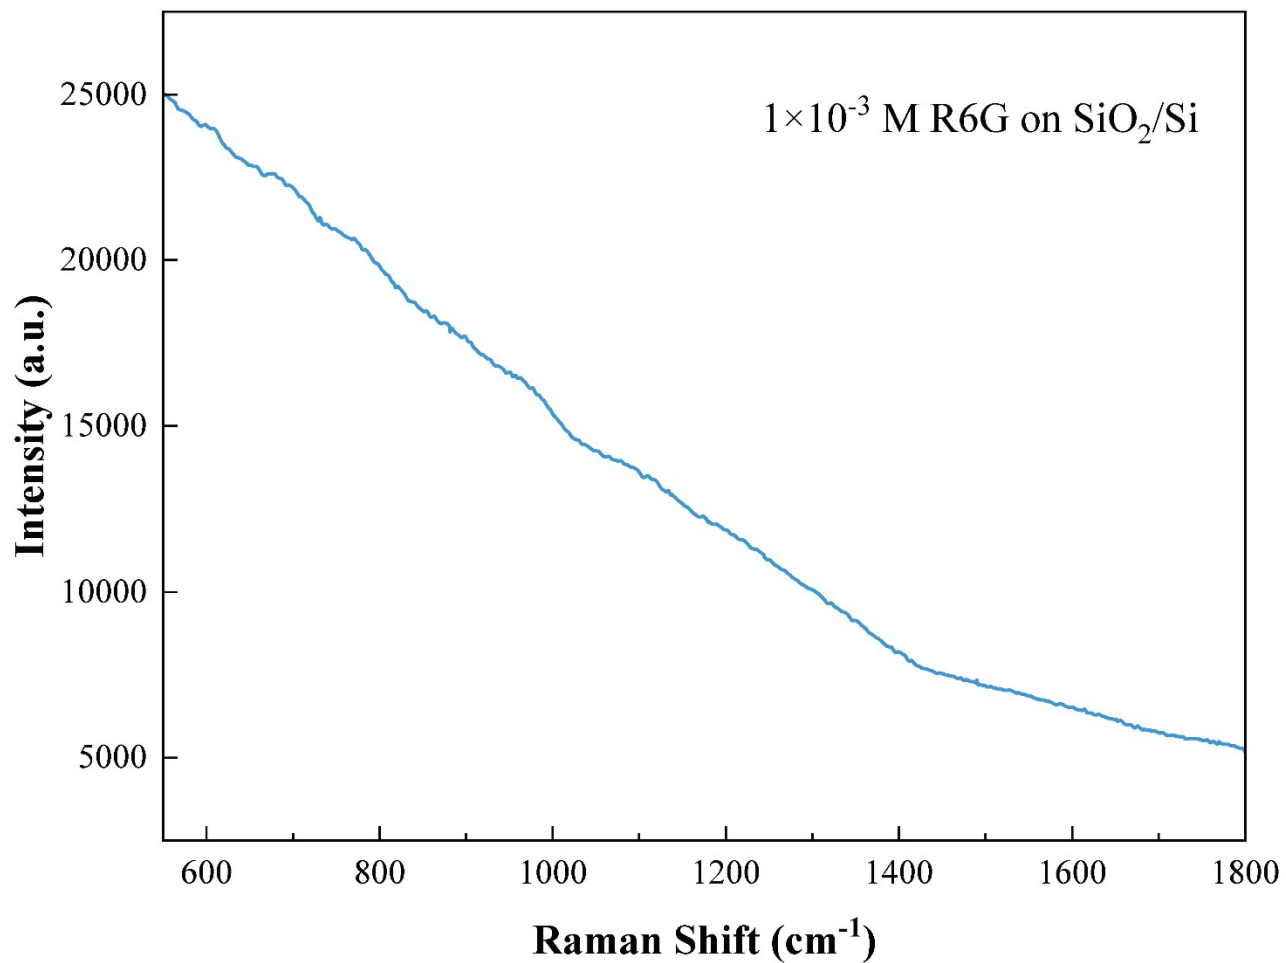

**Fig. S3** Intensive fluorescence background of  $1 \times 10^{-3}$  M R6G solution.

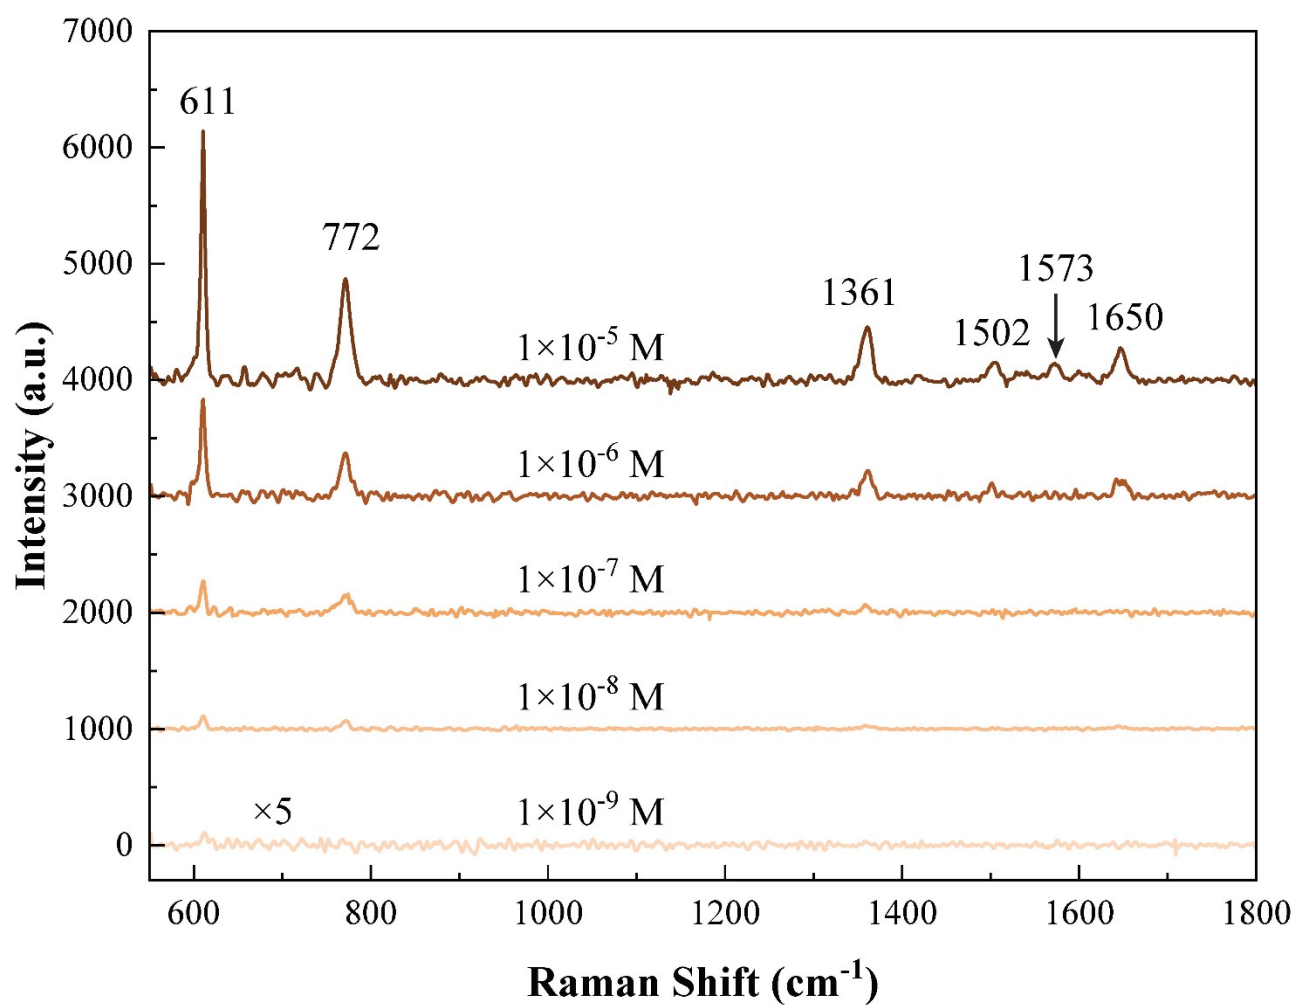

Fig. S4 SERS spectra of R6G on T@Td-ReS<sub>2</sub> as control experiment with LOD of 1×10<sup>-9</sup> M.

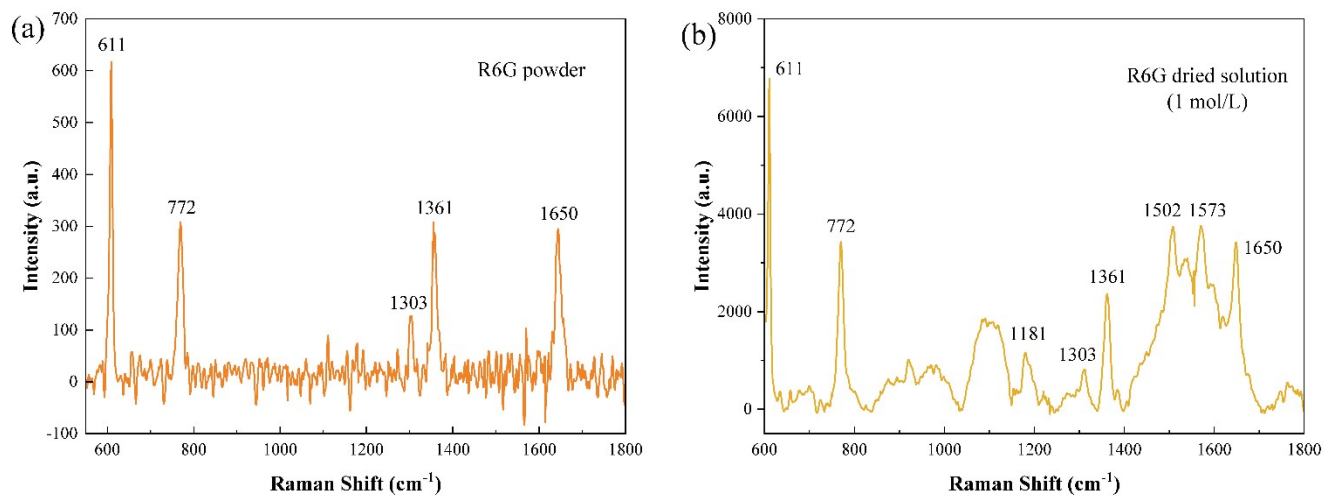

**Fig. S5** Raman signal of (a) R6G powder and (b) 1 M dried R6G solution. The EFs were calculated based on the intensity of 611 cm<sup>-1</sup> and 772 cm<sup>-1</sup> in (b).



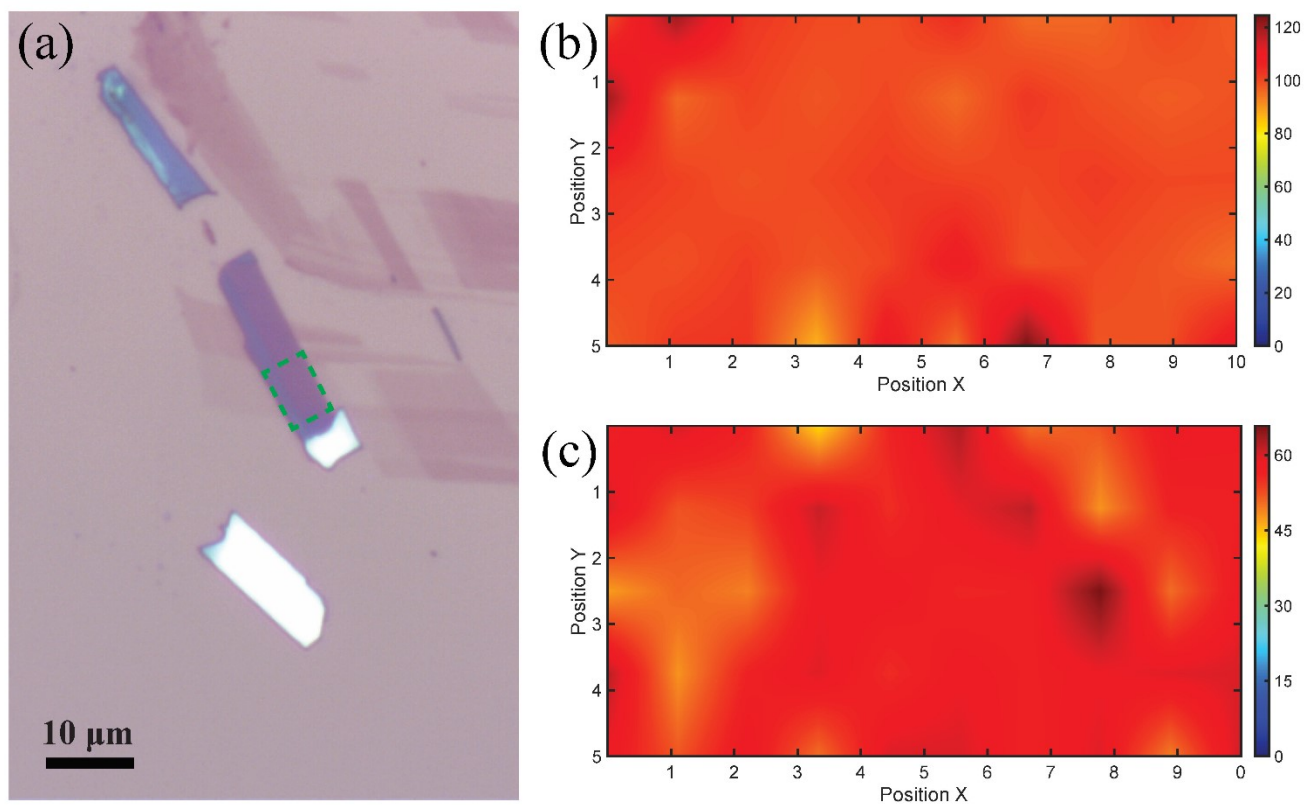

**Fig. S6** (a) Optical microscopic image of the selected mapping area. Heatmap of (b) 611  $\text{cm}^{-1}$  and 772  $\text{cm}^{-1}$ .

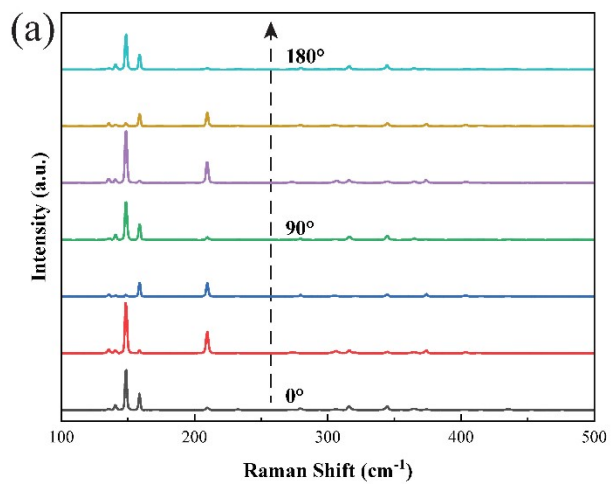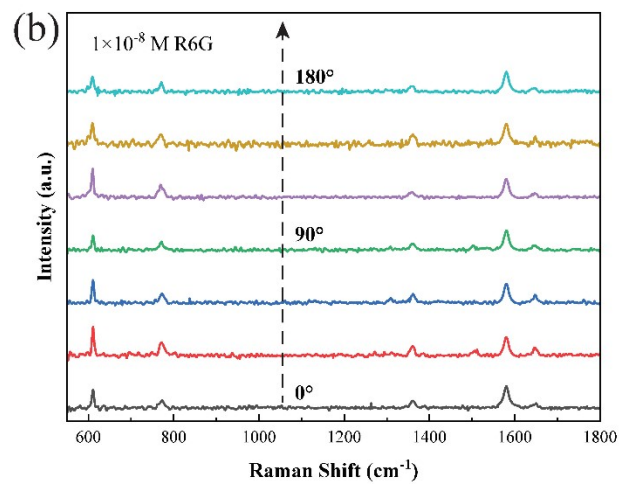

**Fig. S7** Angle-resolved Raman spectra of (a)  $\text{ReS}_2$  and (b) adsorbed R6G with concentration of  $1 \times 10^{-8} \text{ M}$

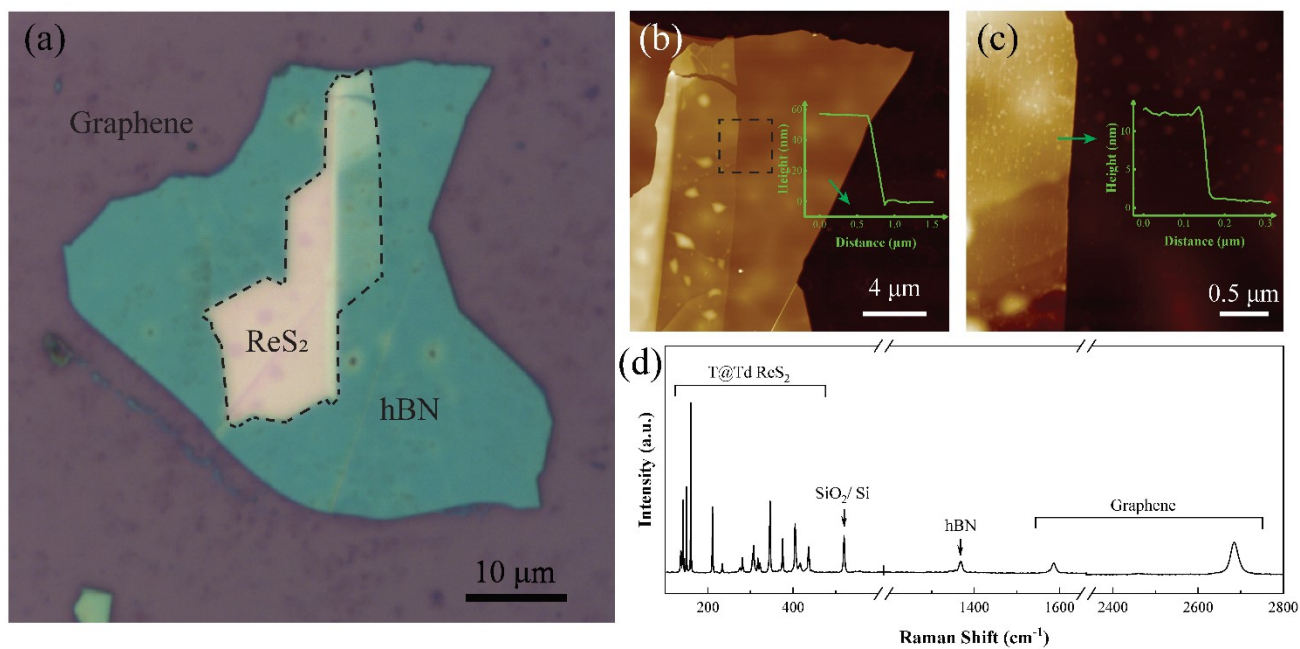

**Fig. S8** (a) Optical microscopic image of T@Td-ReS<sub>2</sub>/hBN/G heterostructure. (b) AFM image of heterostructure presented in (a). Blue arrow indicates the cross section direction. (c) Zoomed AFM image of area marked by dashed-line box in (b) and (d) corresponding cross section.

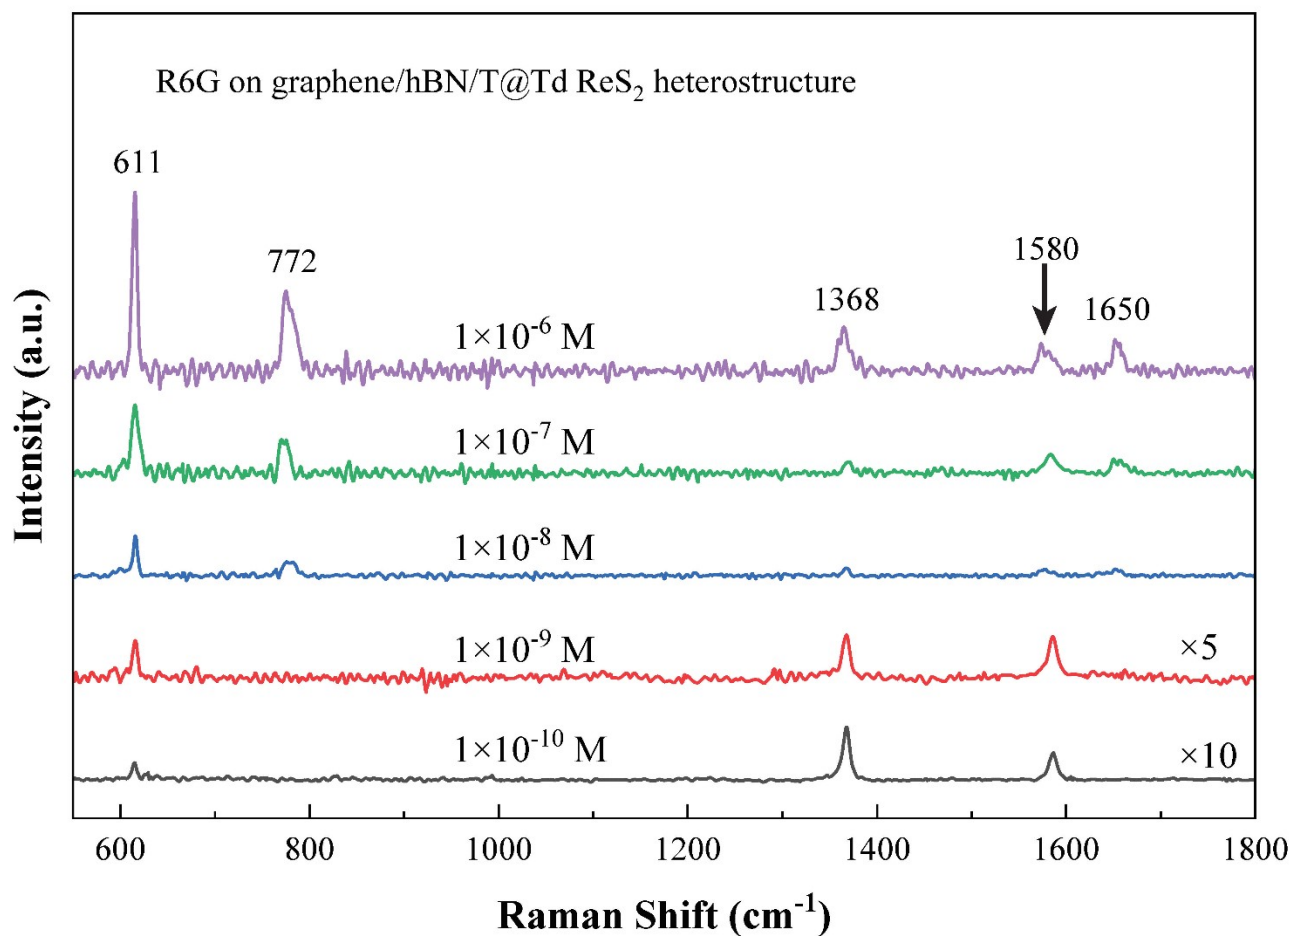

**Fig. S9** SERS spectra of R6G molecules adsorbed on T@Td-ReS<sub>2</sub>/hBN/G with LOD down to  $1 \times 10^{-10}$  M, where the peak located at  $\sim 1368$  cm<sup>-1</sup> and  $\sim 1580$  cm<sup>-1</sup> are attributed to hBN and graphene, respectively.

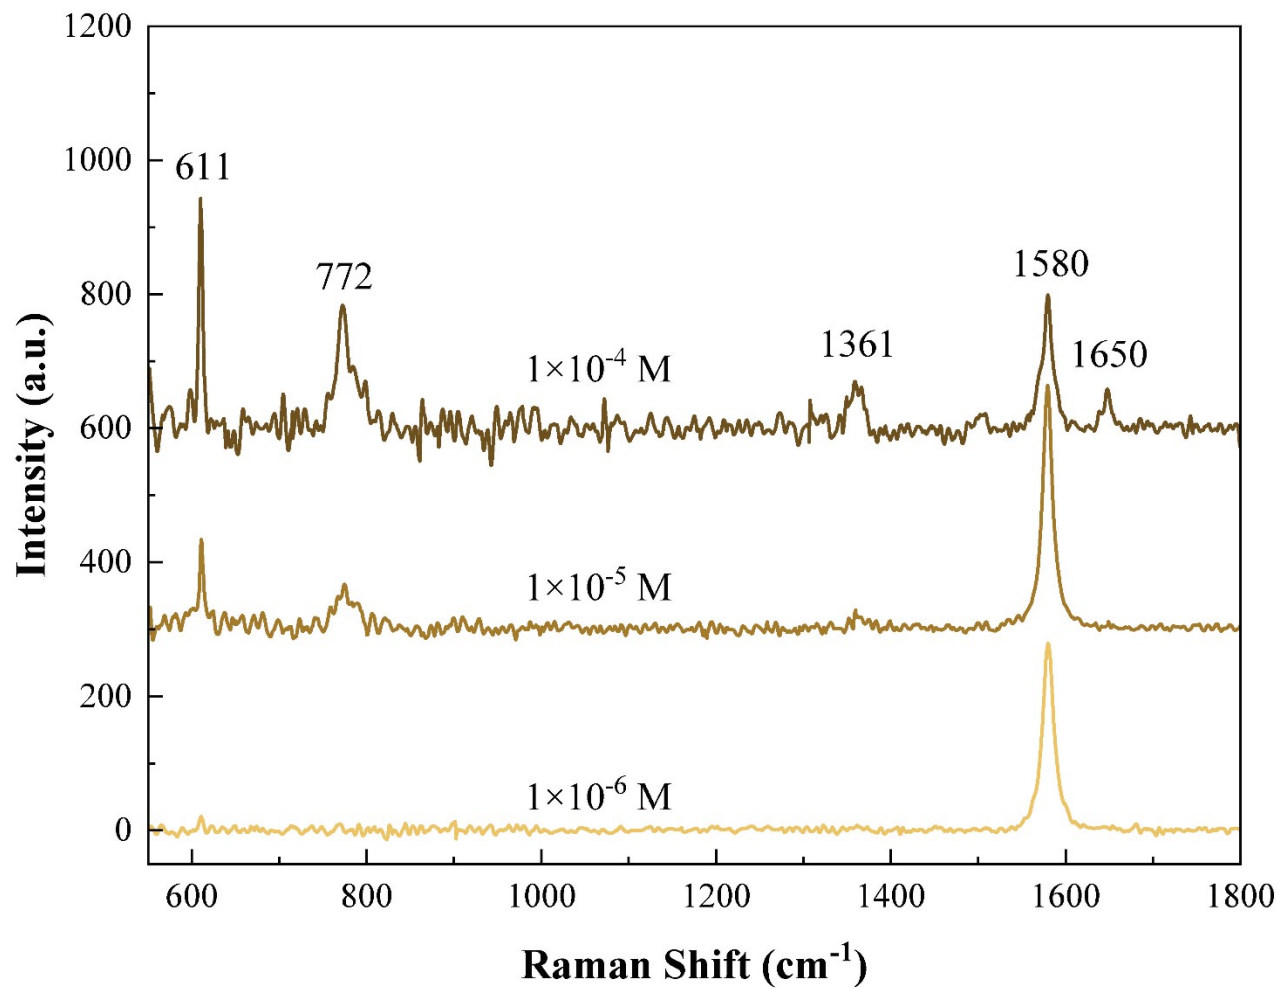

**Fig. S10** SERS spectra of R6G on G/T@Td-ReS<sub>2</sub> excited by 633 nm laser with LOD of 1 × 10<sup>-6</sup> M.
